# Supplementary material for: Dance training is superior to repetitive physical exercise in inducing brain plasticity in the elderly
Source: PubMed Central journal article supplement (PMC6040685; doi:10.1371/journal.pone.0196636), 2018-07-11
Supplement: pone.0196636.s001.pdf [file pone.0196636.s001.pdf]

S1 Table. Characteristics of the dance and sport group (M = Mean; SD = Standard deviation).

|                               | Dance Group n = 20 |      | Sport Group n = 18 |      | T-value | p-value |
|-------------------------------|--------------------|------|--------------------|------|---------|---------|
|                               | M                  | SD   | M                  | SD   |         |         |
| <b>Age [Years]</b>            | 68.16              | 4.31 | 68.72              | 2.68 | .475    | .638    |
| <b>Sex [%]</b>                | 40% male           |      | 56% male           |      | .945    | .351    |
| <b>BMI [kg/m<sup>2</sup>]</b> | 26.65              | 3.54 | 27.41              | 3.50 | .655    | .517    |
| <b>Education [Years]</b>      | 15.32              | 2.34 | 16.33              | 1.40 | 1.605   | .118    |
| <b>BDI-II [Points]</b>        | 5.89               | 3.26 | 4.67               | 3.99 | 1.028   | .311    |
| <b>MMSE [Points]</b>          | 28.32              | .946 | 28.83              | .786 | 1.478   | .076    |

Annotation. BMI = Body-Mass-Index; BDI-II = Becks-Depressions-Inventar II; MMSE = Mini Mental State
