# Supplementary material for: Dance training is superior to repetitive physical exercise in inducing brain plasticity in the elderly
Source: PubMed Central journal article supplement (PMC6040685; doi:10.1371/journal.pone.0196636), 2018-07-11
Supplement: pone.0196636.s002.pdf [file pone.0196636.s002.pdf]

S2 Table. MNI-coordinates and statistical values for gray matter.

| <b>Dance&gt;Sport</b> | <b>region</b> | <b>t-value</b> | <b>z-value</b> | <b>p (uncorr.)</b> | <b>x (mm)</b> | <b>y (mm)</b> | <b>z (mm)</b> |
|-----------------------|---------------|----------------|----------------|--------------------|---------------|---------------|---------------|
|                       | IGTS          | 4.53           | 3.97           | 0.000***           | -57           | -39           | 15            |
|                       | Insula        | 4.50           | 3.95           | 0.000***           | -39           | 23            | 3             |
|                       | IGPre         | 4.32           | 3.82           | 0.000***           | -50           | -13           | 12            |
|                       | MCC           | 4.26           | 3.78           | 0.000***           | 0             | 12            | 34            |
|                       | ISMA          | 3.46           | 3.17           | 0.001***           | -2            | 11            | 45            |
|                       | IGPo          | 4.23           | 3.75           | 0.000***           | -53           | -24           | 18            |
|                       | ACC           | 4.07           | 3.64           | 0.000***           | 0             | 38            | 9             |
|                       | IGFM          | 3.78           | 3.42           | 0.000***           | -38           | 3             | 57            |
| <b>Sport&gt;Dance</b> | <b>region</b> | <b>t-value</b> | <b>z-value</b> | <b>p (uncorr.)</b> | <b>x(mm)</b>  | <b>y (mm)</b> | <b>z (mm)</b> |
|                       | rGF           | 4.88           | 4.20           | 0.000***           | 32            | -33           | -21           |
|                       | IGL           | 4.80           | 4.15           | 0.000***           | -2            | -70           | 4             |
|                       | rTP           | 4.52           | 3.96           | 0.000***           | 23            | 8             | -38           |
|                       | V1            | 4.15           | 3.70           | 0.000***           | -8            | -97           | -8            |
|                       | Cerebellum    | 3.98           | 3.57           | 0.000***           | 33            | -64           | -20           |

*Annotation.* IGTS = left gyrus temporalis superior, IGPre = left gyrus precentralis, MCC = medial cingular cortex, ISMA = left supplementary-motor area, IGPo = left gyrus postcentralis, ACC = anterior cingular cortex, IGFM = left gyrus frontalis medius, rGF = right gyrus fusiformis, IGL = left gyrus lingualis, rTP = right temporalpol, V1 = primary visual cortex, \*\*\* $p \leq .001$  (uncorrected).
