# Supplementary material for: Dance training is superior to repetitive physical exercise in inducing brain plasticity in the elderly
Source: PubMed Central journal article supplement (PMC6040685; doi:10.1371/journal.pone.0196636), 2018-07-11
Supplement: pone.0196636.s003.pdf [file pone.0196636.s003.pdf]

S3 Table. MNI-coordinates and statistical values for white matter

| <b>Dance&gt;Sport</b> | <b>region</b> | <b>t-value</b> | <b>z-value</b> | <b>p (uncorr.)</b> | <b>x (mm)</b> | <b>y (mm)</b> | <b>z (mm)</b> |
|-----------------------|---------------|----------------|----------------|--------------------|---------------|---------------|---------------|
|                       | CC-T          | 4.93           | 4.24           | 0.000***           | 15            | 6             | 28            |
|                       | CC-S          | 4.47           | 3.92           | 0.000***           | 0             | -31           | 15            |
|                       | AWS           | 3.82           | 3.45           | 0.000***           | -33           | -3            | 46            |
|                       | PWS           | 4.22           | 3.75           | 0.000***           | -36           | -36           | 30            |
| <b>Sport&gt;Dance</b> | <b>region</b> | <b>t-value</b> | <b>z-value</b> | <b>p (uncorr.)</b> | <b>x (mm)</b> | <b>y (mm)</b> | <b>z (mm)</b> |
|                       | TWS           | 3.95           | 3.55           | 0.000***           | 30            | 9             | -38           |
|                       | OWS           | 3.86           | 3.48           | 0.000***           | 21            | -82           | -2            |

Annotation. CC-T = truncus of corpus callosum, CC-S = splenium of corpus callosum, AWS = anterior white matter, PWS = posterior white matter, TWS = temporal white matter, OWS = occipital white matter, \*\*\*p ≤ .001 (uncorrected).
