# Supplementary material for: Dance training is superior to repetitive physical exercise in inducing brain plasticity in the elderly
Source: PubMed Central journal article supplement (PMC6040685; doi:10.1371/journal.pone.0196636), 2018-07-11
Supplement: pone.0196636.s004.pdf [file pone.0196636.s004.pdf]

S4 Table. BDNF serum and plasma levels before and after intervention.

|                                    | Dance Group n = 19 |        | Sport Group n = 16 |        | p-value<br>(DG vs SG) |
|------------------------------------|--------------------|--------|--------------------|--------|-----------------------|
|                                    | M                  | SEM    | M                  | SEM    |                       |
| BDNF Plasma level [pg/ml] pre      | 1509               | ± 231  | 2087               | ± 316  | .142                  |
| BDNF Plasma level [pg/ml] post     | 2220               | ± 214  | 2048               | ± 281  | .623                  |
| p-value (pre vs post intervention) | .007*              |        |                    |        |                       |
| p-value (interaction effect)       | .046*              |        |                    |        |                       |
| BDNF Serum level [pg/ml] pre       | 35238              | ± 2269 | 30442              | ± 2637 | .175                  |
| BDNF Serum level [pg/ml] post      | 36348              | ± 2403 | 29724              | ± 2758 | .078                  |
| p-value (pre vs post intervention) | .354               |        |                    |        |                       |
| p-value (interaction effect)       | .303               |        |                    |        |                       |

Annotation. Repeated-measures ANOVA following post hoc pairwise comparison (Bonferroni).
