# Supplementary material for: Dance training is superior to repetitive physical exercise in inducing brain plasticity in the elderly
Source: PubMed Central journal article supplement (PMC6040685; doi:10.1371/journal.pone.0196636), 2018-07-11
Supplement: pone.0196636.s005.pdf [file pone.0196636.s005.pdf]

S5 Table. Mean and standard deviation of performances in the domain Attention in both groups.

|                | Dance Group |     |      |     | Sport Group |     |      |     | ANOVA |      |      |      |              |      |
|----------------|-------------|-----|------|-----|-------------|-----|------|-----|-------|------|------|------|--------------|------|
|                | Pre         |     | Post |     | Pre         |     | Post |     | Group |      | Time |      | Group x Time |      |
|                | M           | SD  | M    | SD  | M           | SD  | M    | SD  | F     | p    | F    | p    | F            | P    |
| Alert_vis [RT] | 293         | 72  | 277  | 42  | 263         | 33  | 255  | 42  | 3.63  | .064 | 2.98 | .092 | 0.42         | .522 |
| Alert_aud [RT] | 284         | 66  | 259  | 27  | 255         | 27  | 245  | 28  | 3.76  | .059 | 9.04 | .005 | 1.51         | .226 |
| Go/NoGo [RT]   | 428         | 56  | 441  | 58  | 424         | 55  | 423  | 65  | 0.44  | .511 | 0.69 | .410 | 0.96         | .333 |
| Go/NoGo [F]    | 1.52        | 1.4 | 4.04 | 1.0 | 1.50        | 1.4 | 1.25 | 1.3 | 0.11  | .747 | 1.92 | .174 | 0.19         | .667 |
| Go/NoGo [M]    | 0.61        | 1.5 | 0.17 | 0.6 | 0.20        | 0.5 | 0.20 | 0.5 | 0.91  | .346 | 1.23 | .275 | 1.23         | .275 |
| D_Att_vis [RT] | 917         | 130 | 910  | 88  | 847         | 70  | 842  | 86  | 6.51  | .015 | 0.24 | .624 | 0.00         | .969 |
| D_Att_aud [RT] | 651         | 86  | 637  | 93  | 652         | 114 | 661  | 146 | 0.16  | .690 | 0.03 | .864 | 0.80         | .375 |
| D_Att [F]      | 2.04        | 1.7 | 1.35 | 1.9 | 1.15        | 0.9 | 1.30 | 1.7 | 1.19  | .280 | 1.34 | .254 | 3.22         | .080 |
| D_Att [M]      | 2.09        | 2.7 | 2.39 | 2.2 | 1.25        | 1.4 | 1.30 | 1.1 | 3.64  | .064 | 0.27 | .608 | 0.14         | .712 |
| Flex [RT]      | 971         | 243 | 892  | 249 | 864         | 223 | 839  | 237 | 1.86  | .181 | 1.47 | .232 | 0.37         | .546 |
| Flex [F]       | 3.52        | 6.9 | 2.09 | 2.9 | 1.85        | 2.3 | 1.25 | 2.1 | 1.73  | .195 | 1.45 | .236 | 0.24         | .624 |
| ZVT [bit/sec.] | 32.2        | 7.1 | 34.3 | 7.7 | 36.6        | 6.9 | 37.5 | 8.5 | 2.25  | .141 | 1.98 | .167 | 0.40         | .851 |

Annotation. Testbattery for Attention: Alter\_vis = alertness (visual), Alert\_aud = alertness (+ auditory distractor), Go/NoGo = selective attention (RT = reaction time; F = false; M = missed), D\_Att\_vis = divided attention (visual), Dev\_Att\_aud = divided attention (auditory), Flex = flexibility; ZVT = Zahlenverbindungstest (trail making; processing speed), level of significance:  $p < .05$ .
