# Supplementary material for: Dance training is superior to repetitive physical exercise in inducing brain plasticity in the elderly
Source: PubMed Central journal article supplement (PMC6040685; doi:10.1371/journal.pone.0196636), 2018-07-11
Supplement: pone.0196636.s006.pdf [file pone.0196636.s006.pdf]

S6 Table. Mean and standard deviation of performances in the domain Memory in both groups.

|                | Dance Group |     |      |     | Sport Group |     |       |     | ANOVA |      |       |      |              |      |
|----------------|-------------|-----|------|-----|-------------|-----|-------|-----|-------|------|-------|------|--------------|------|
|                | Pre         |     | Post |     | Pre         |     | Post  |     | Group |      | Time  |      | Group x Time |      |
|                | M           | SD  | M    | SD  | M           | SD  | M     | SD  | F     | P    | F     | P    | F            | p    |
| VLMT_L [pt]    | 47.4        | 8.8 | 46.3 | 7.7 | 48.9        | 8.8 | 50.43 | 9.0 | 1.52  | .224 | 0.03  | .858 | 1.16         | .287 |
| VLMT_RI [pt]   | 10.0        | 3.2 | 9.04 | 3.0 | 10.3        | 3.0 | 10.38 | 3.0 | 1.01  | .322 | 1.09  | .303 | 1.65         | .206 |
| VLMT_DR [pt]   | 10.0        | 2.8 | 9.1  | 3.1 | 10.0        | 3.2 | 10.43 | 3.2 | 0.63  | .432 | 0.26  | .615 | 2.55         | .188 |
| VLMT_REC [pt]  | 11.4        | 3.5 | 10.3 | 3.8 | 11.1        | 4.1 | 11.29 | 3.0 | 0.13  | .719 | 0.63  | .431 | 1.49         | .229 |
| ROCFT_C [pt]   | 30.2        | 4.6 | 31.7 | 4.5 | 32.8        | 2.7 | 33.   | 1.4 | 3.99  | .052 | 2.86  | .099 | 1.48         | .231 |
| ROCFT_IR [pt]  | 16.1        | 6.0 | 21.5 | 7.9 | 18.5        | 5.5 | 24.38 | 5.6 | 2.40  | .129 | 39.47 | .000 | 0.05         | .827 |
| ROCFT_DR [pt]  | 16.1        | 5.3 | 20.8 | 7.5 | 18.7        | 5.5 | 24.24 | 6.1 | 3.47  | .070 | 31.52 | .000 | 0.22         | .646 |
| ROCFT_REC [pt] | 20.5        | 1.5 | 19.3 | 2.7 | 19.0        | 1.5 | 18.55 | 2.1 | 4.70  | .037 | 4.30  | .045 | 0.61         | .442 |
| WMS_DS_fw [pt] | 7.7         | 1.8 | 8.1  | 2.1 | 8.3         | 1.8 | 8.44  | 1.7 | 0.78  | .383 | 0.61  | .439 | 0.04         | .841 |

Annotation. VLMT = Verbaler Lern-und Merkfähigkeitstest (verbal learning and memory test): VLMT-L = Learning, VLMT\_RI = recall after interference list, VLMT\_DR = delayed recall, VLMT\_REC = recognition; ROCFT = Rey-Osterrieth Complex Figure Test, ROCFT\_C = copy, ROCFT\_IR = immediate recall, ROCFT\_DR = delayed recall, ROCFT\_REC = recognition; WMS\_DS\_fw = Wechselr-Memory Scale (Digit Span forward); pt = points
