# Supplementary material for: Dance training is superior to repetitive physical exercise in inducing brain plasticity in the elderly
Source: PubMed Central journal article supplement (PMC6040685; doi:10.1371/journal.pone.0196636), 2018-07-11
Supplement: pone.0196636.s007.pdf [file pone.0196636.s007.pdf]

S7 Table. Mean and standard deviation of performances in the domain Executive Functions in both groups.

|                    | Dance Group |     |      |     | Sport Group |     |      |     | ANOVA |      |      |      |              |      |
|--------------------|-------------|-----|------|-----|-------------|-----|------|-----|-------|------|------|------|--------------|------|
|                    | Pre         |     | Post |     | Pre         |     | Post |     | Group |      | Time |      | Group x Time |      |
|                    | M           | SD  | M    | SD  | M           | SD  | M    | SD  | F     | P    | F    | P    | F            | P    |
| WMS_DS_bw [pt]     | 6.05        | 1.5 | 6.2  | 1.6 | 6.8         | 1.7 | 6.8  | 1.7 | 2.25  | .142 | 0.09 | .763 | 0.09         | .763 |
| RWT_M-Words [pt]   | 17.7        | 5.8 | 17.8 | 4.9 | 18.1        | 3.8 | 19.0 | 4.9 | 0.42  | .520 | 0.35 | .560 | 0.24         | .631 |
| RWT_G-R-Words [pt] | 19.5        | 4.3 | 19.0 | 4.3 | 21.5        | 4.9 | 21.8 | 5.6 | 3.57  | .066 | 0.02 | .902 | 0.21         | .649 |
| RWT_animals [pt]   | 30.7        | 7.1 | 30.5 | 6.2 | 32.9        | 5.1 | 33.3 | 7.3 | 2.23  | .143 | 0.00 | .971 | 0.05         | .818 |
| RWT_CI-FI [pt]     | 19.7        | 4.3 | 21.0 | 5.4 | 20.4        | 4.0 | 20.5 | 4.5 | 0.00  | .963 | 1.26 | .269 | 0.92         | .342 |

Annotation. WMS\_DS\_bw = Wechsler Memory Scale (Digit Span backward); RWT = Regensburger Wortflüssigkeitstest (verbal word fluency), RWT\_M-Words = formallexikal word fluency, RWT\_G-R-words = formallexikal. shift between categories, RWT\_animals = semantic word fluency, RWT\_CI-FI = Clothing and flowers (semantic shift of category).
